# Supplementary material
Source: publisher figshare collection journal article supplement (https://acs.figshare.com/ndownloader/files/11456351)
Supplement: Supplementary file 1 [file 11456351]

# Supporting Information

## Lithium Sulfonate/Carboxylate Anchored Polyvinyl Alcohol

### Separator for Lithium Sulfur Batteries

Kai Jiang<sup>ab†</sup>, Shu Gao<sup>b†</sup>, Ruxing Wang<sup>b</sup>, Mao Jiang<sup>b</sup>, Jing Han<sup>b</sup>, Tiantian Gu<sup>b</sup>,

Mengyun Liu<sup>b</sup>, Shijie Cheng<sup>a</sup> and Kangli Wang<sup>a\*</sup>

<sup>a</sup>State Key Laboratory of Advanced Electromagnetic Engineering and Technology,  
School of Electrical and Electronic Engineering, Huazhong University of Science and  
Technology, Wuhan, Hubei 430074, China

<sup>b</sup>State Key Laboratory of Materials Processing and Die & Mould Technology, School  
of Materials Science and Engineering, Huazhong University of Science and  
Technology, Wuhan, Hubei 430074, China

\* Corresponding to Prof. Wang, E-mail: [klwang@hust.edu.cn](mailto:klwang@hust.edu.cn), Tel.:  
+86-27-87559524.

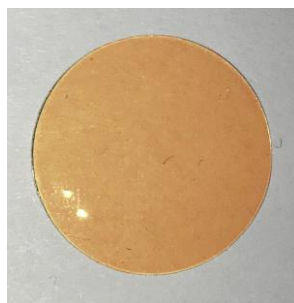

Figure S1. The photograph of prepared P-S/C-Li.

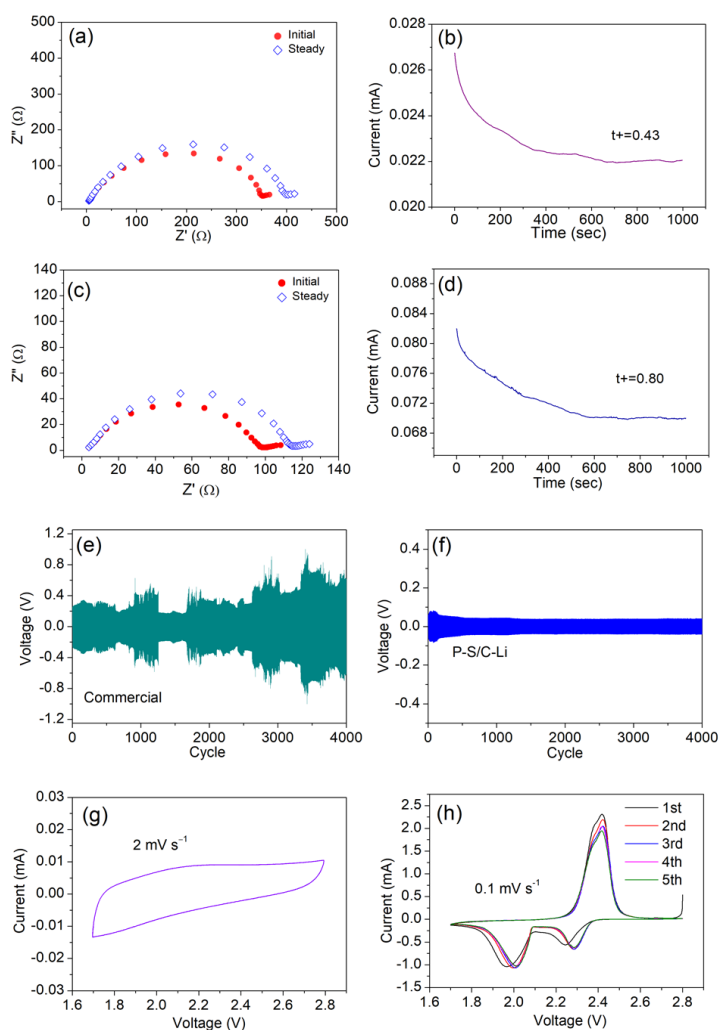

Figure S2. EIS at initial and steady states, responsive currents and the plate/strip voltage of Li/Li cell comprising commercial separator (a, b, e) and P-S/C-Li (c, d, f), respectively. The cyclic voltammograms of Li//stainless steel at  $2 \text{ mV s}^{-1}$  (g) and Li/S@C at  $0.1 \text{ mV s}^{-1}$  (h) applying P-S/C-Li.

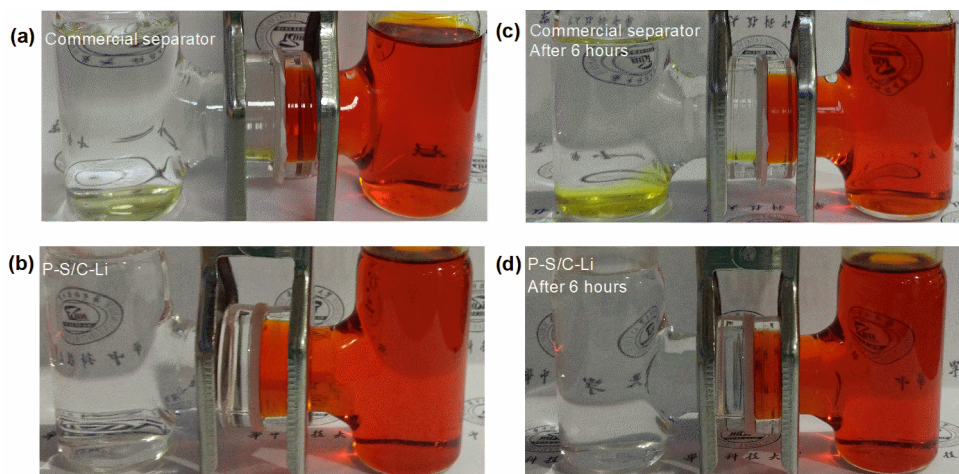

Figure S3. The verification of polysulfide immobilization. Freshly assembled: commercial (a) and P-S/C-Li (b). After 6h: commercial (c) and P-S/C-Li (d).

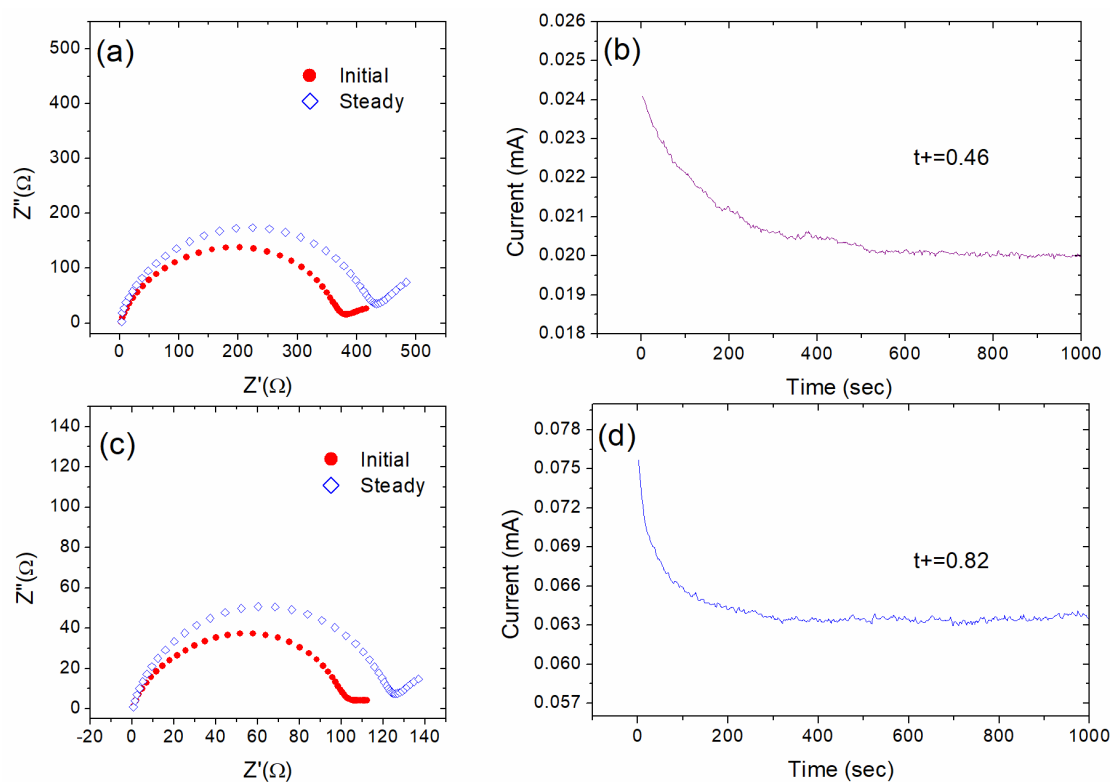

Figure S4. Lithium transference number measurements in 1 M LiTFSI + 0.2 M Li<sub>2</sub>S<sub>8</sub> DOL/DME (1:1, v/v) electrolyte. EIS in initial and steady status and current plots for commercial (a, b) and P-S/C-Li (c, d) separators, respectively.

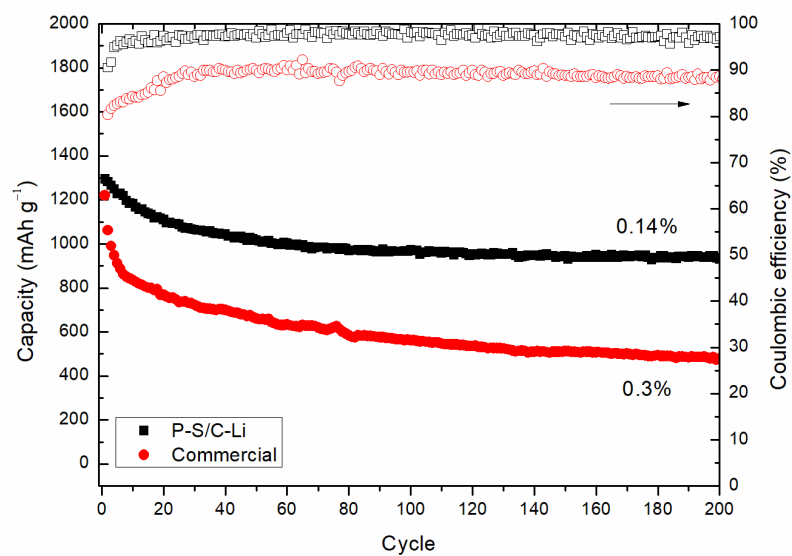

Figure S5. The galvanostatic charge/discharge performances at  $0.5 \text{ A g}^{-1}$  for 200 cycles applying S@C cathode.

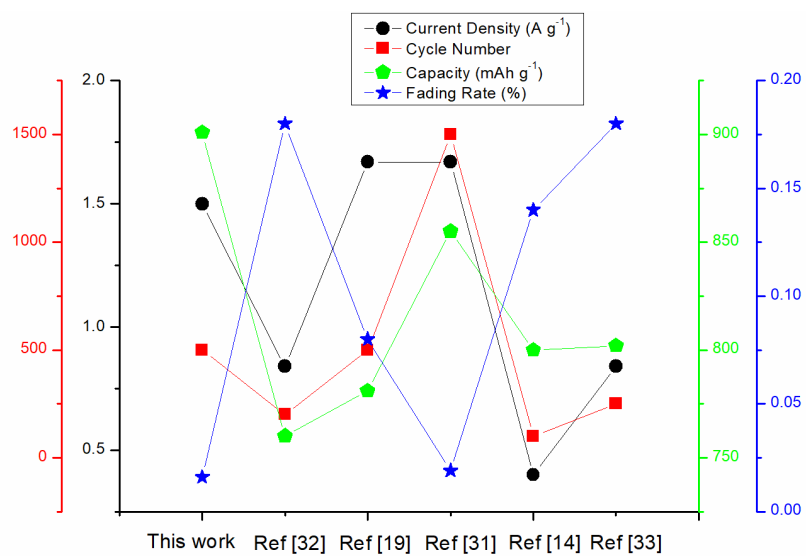

Figure S6. The LSB performances applying various functional separator in literatures.
